# Supplementary material for: Tuberculosis Susceptibility and Vaccine Protection Are Independently Controlled by Host Genotype
Source: PubMed Central journal article supplement (PMC5030360; doi:10.1128/mbio.01516-16), 2016-09-20

# Supplementary Figure 2: Vaccine protection by individual mouse genotype

Key:

● Naive

■ BCG

## A - CC001

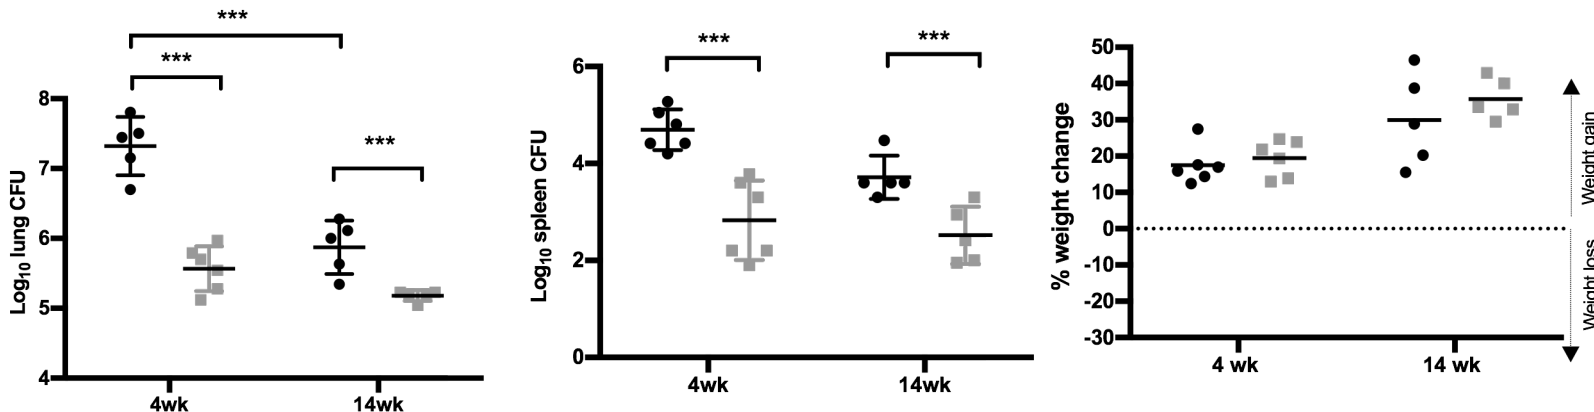

## B - CC002

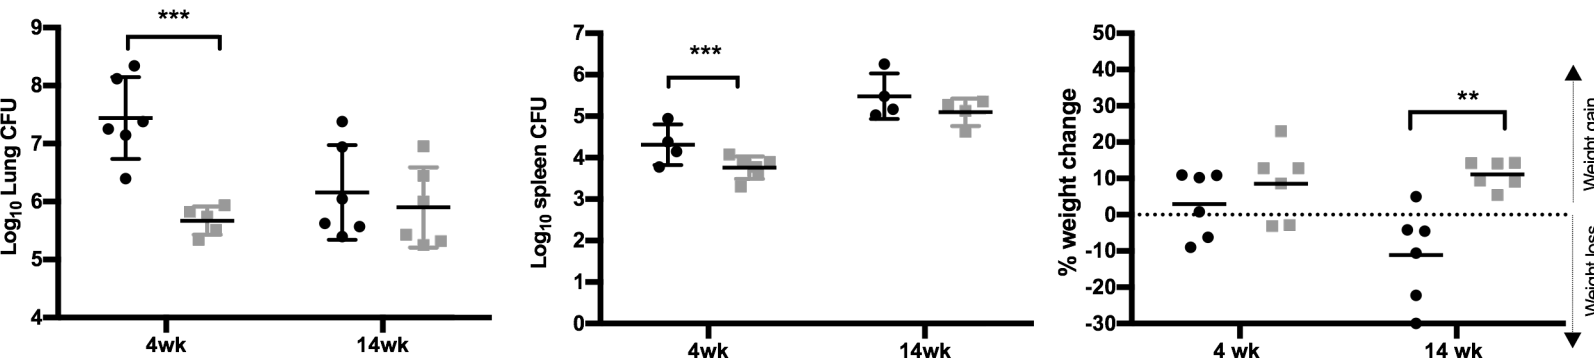

## C - WSB

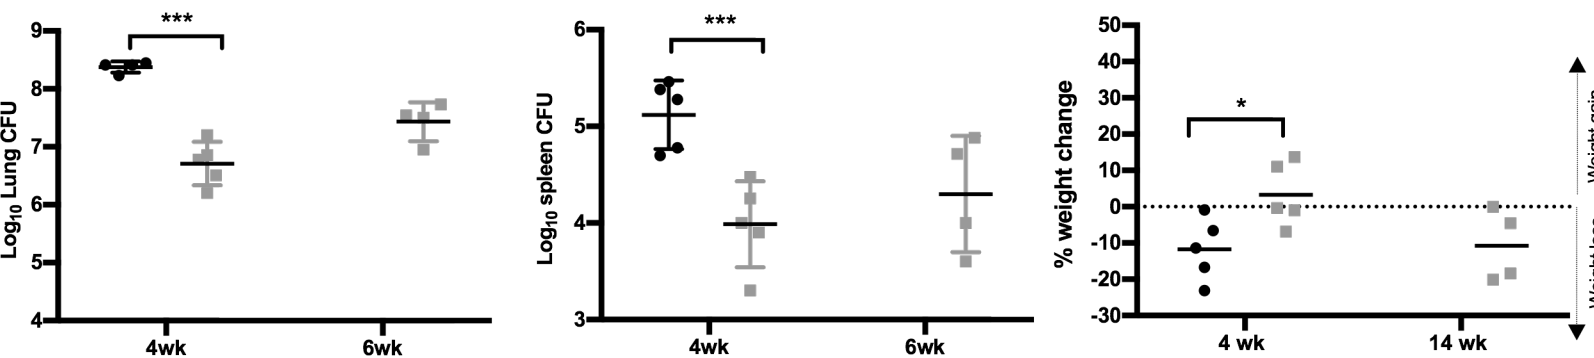

## D - B6

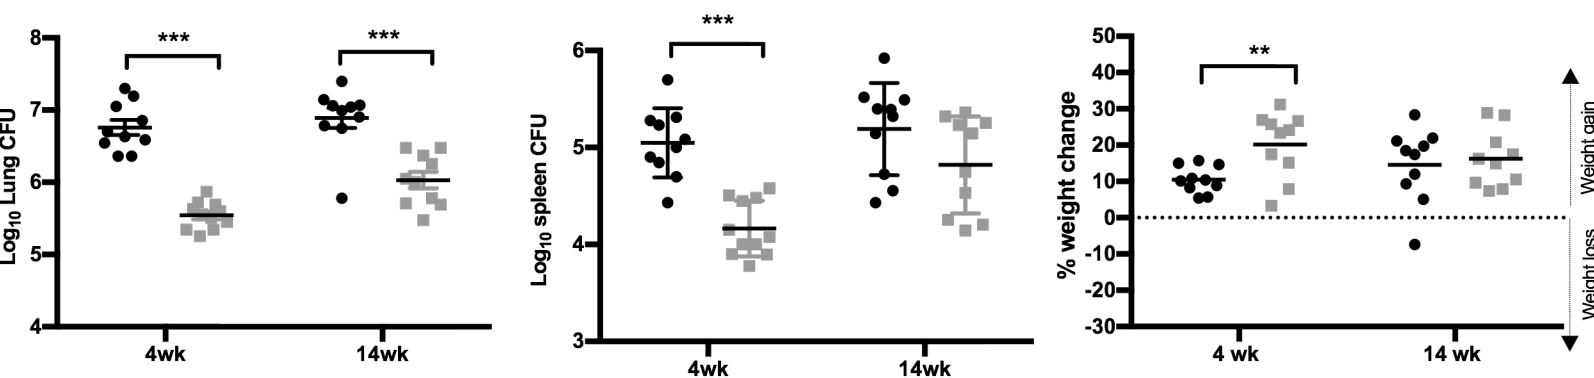

**Key:**

● Naive

■ BCG

**E - A/J**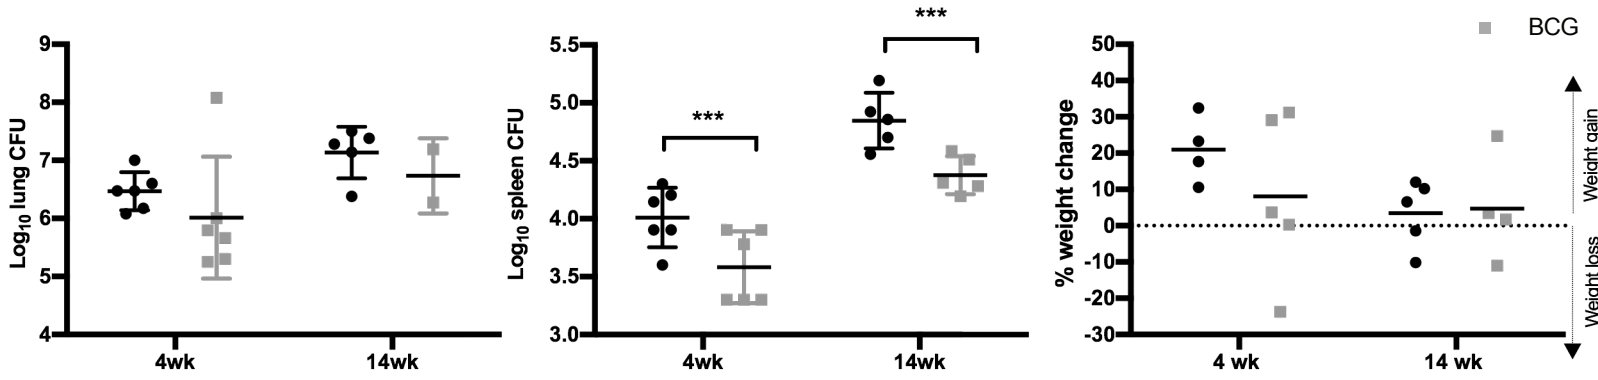**F - 129**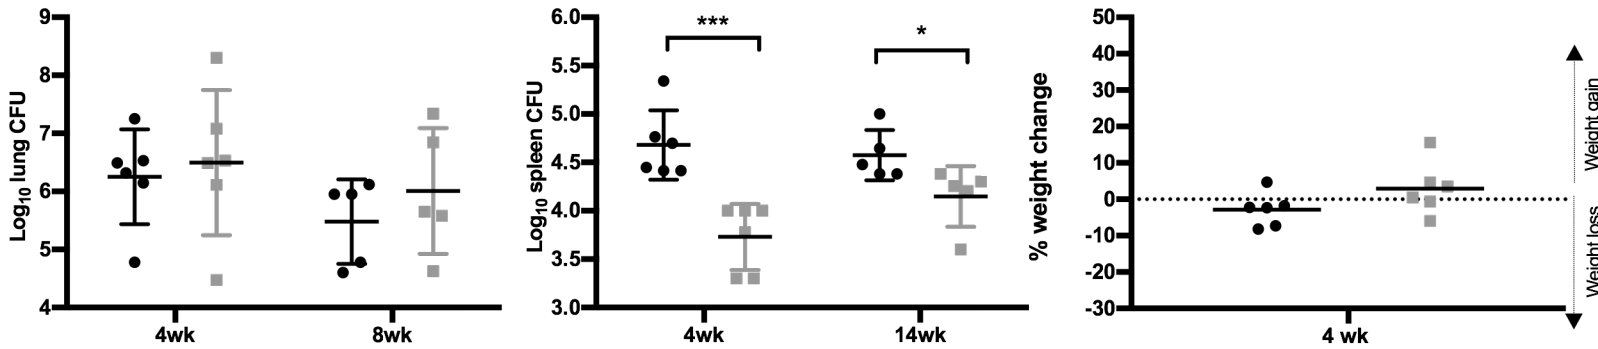**G - CC019**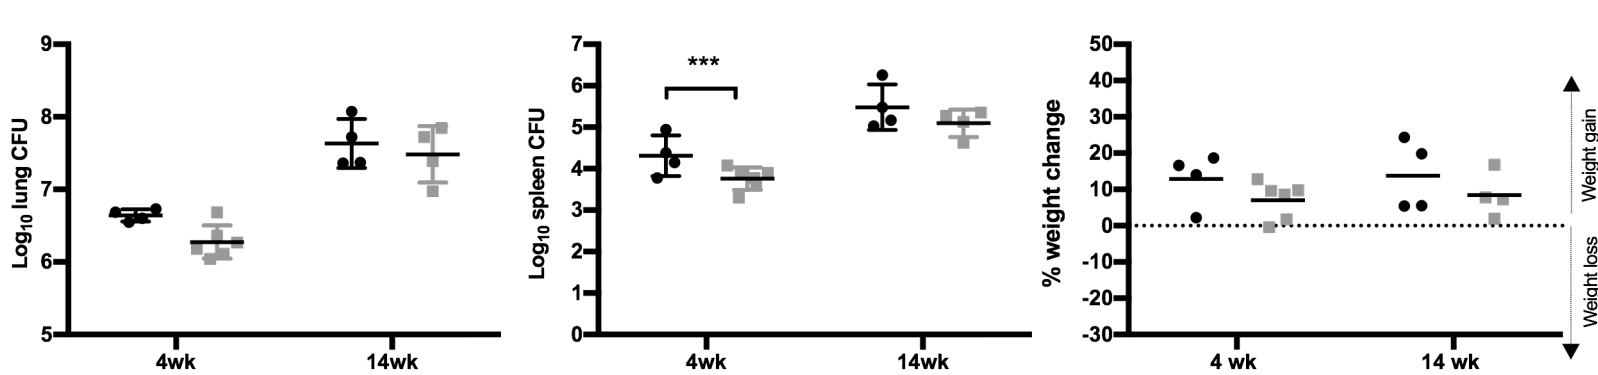**H - CAST**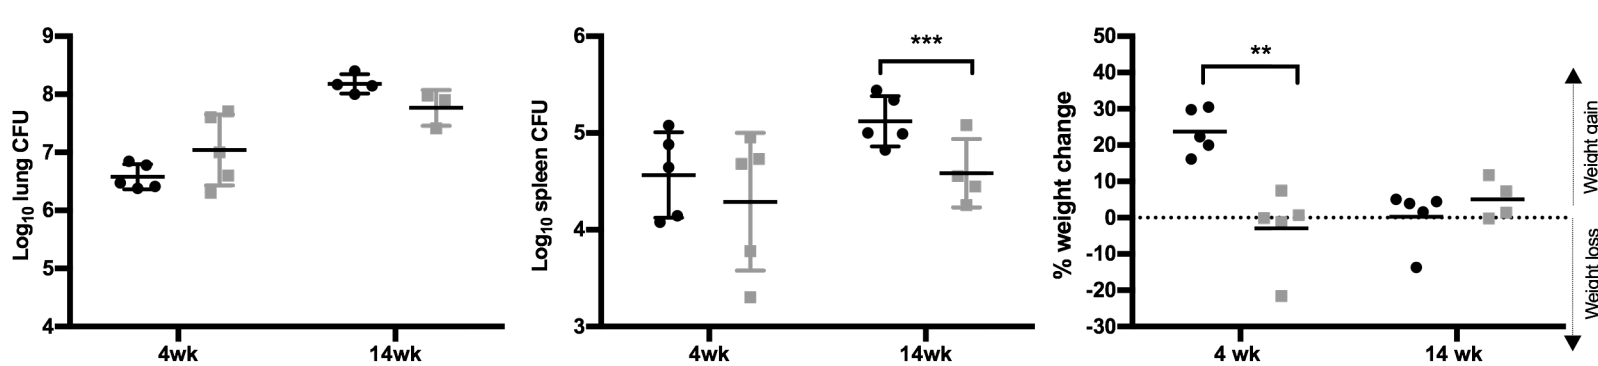

**Key:**  
● Naive  
■ BCG

### I - PWK

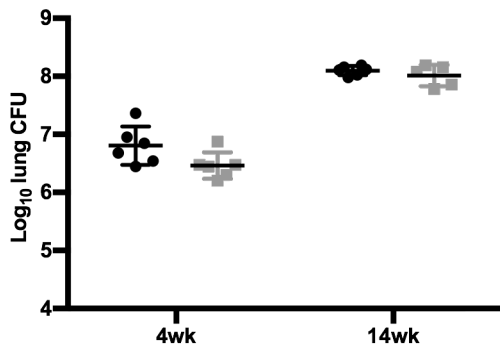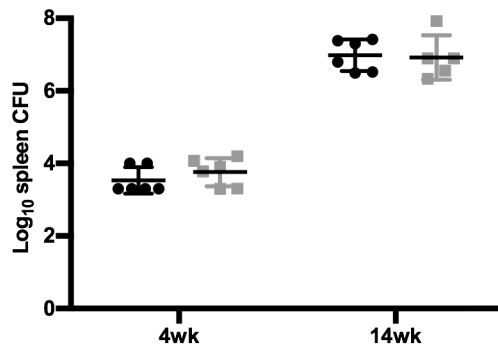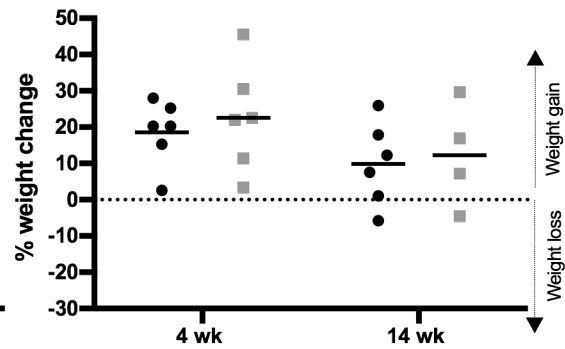

## J - NOD

### Key:

- Naive
- BCG

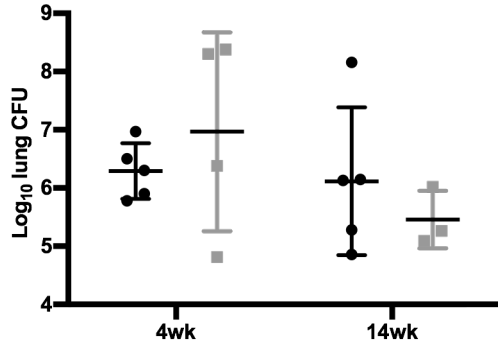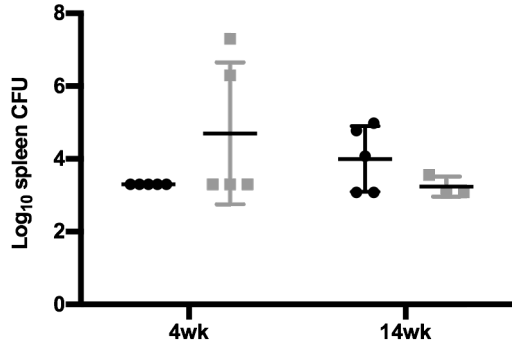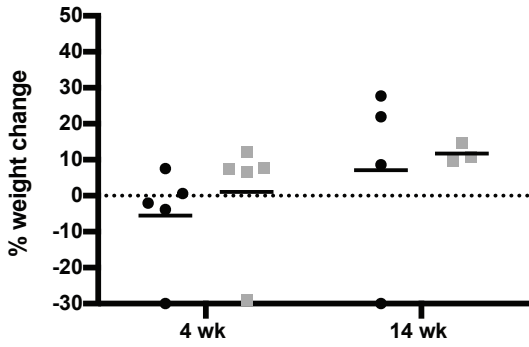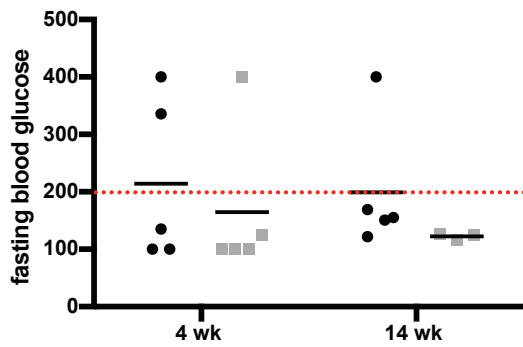

## K - NZO

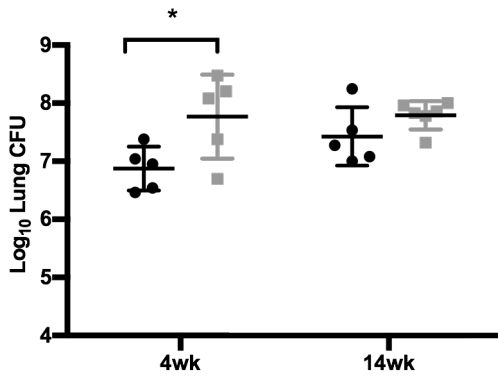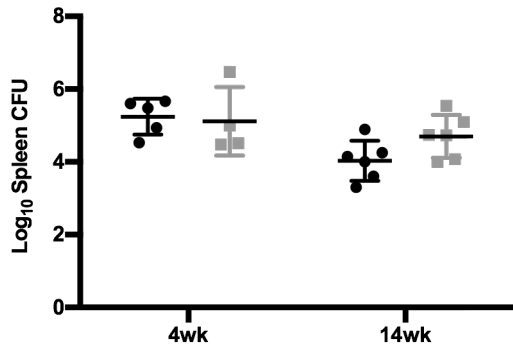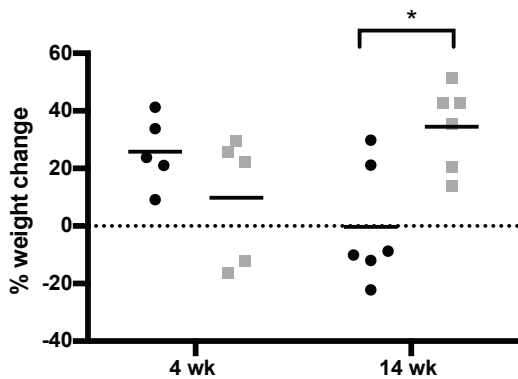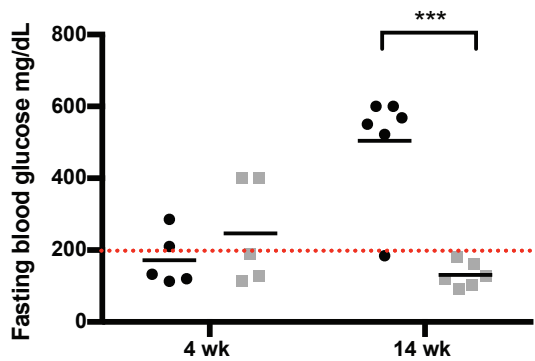

Supplement: mbo004162994sf2.pdf [file mbo004162994sf2.pdf]
